# Supplementary material for: Characterization of OMI tropospheric NO 2 over the Baltic Sea region
Source: Copernicus journal article supplement (doi:10.5194/acp-14-7795-2014), 2014-08-05
Supplement: Supplementary file 1 [file acp-14-7795-2014-supplement.zip]

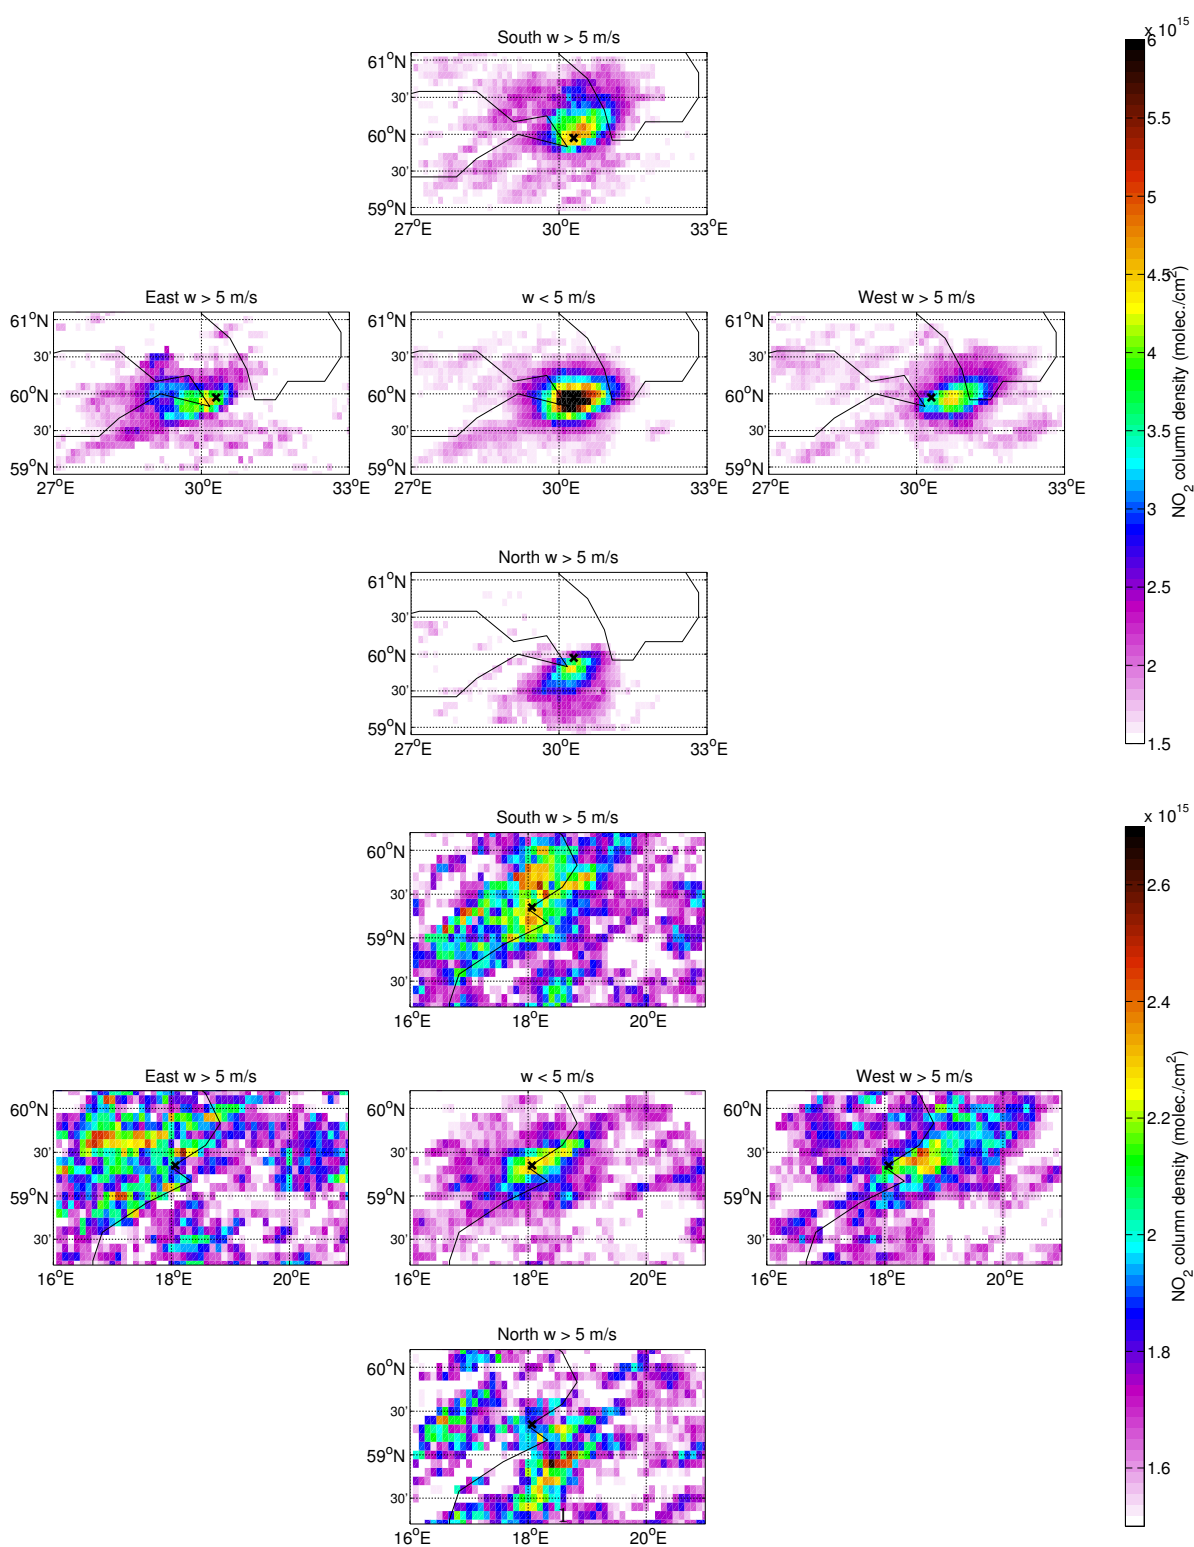

FIGURE S1. Same as in Figure 3 but for Saint Petersburg and Stockholm (upper and lower panel, respectively).
