# Supplementary material for: Characterization of OMI tropospheric NO 2 over the Baltic Sea region
Source: Copernicus journal article supplement (doi:10.5194/acp-14-7795-2014), 2014-08-05
Supplement: Supplementary file 5 [file acp-14-7795-2014-supplement.zip]

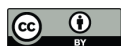

## *Supplement of*

# **Characterization of OMI tropospheric NO<sub>2</sub> over the Baltic Sea region**

**I. Ialongo et al.**

*Correspondence to:* I. Ialongo (iolanda.ialongo@fmi.fi)

- Supplement-Cover-Letter.pdf
- S1.pdf
- S2.pdf
- \_\_MACOSX
  - .\_S1.pdf
  - .\_S2.pdf
